# Supplementary material for: The Many Faces of Fear: Comparing the Pathways and Impacts of Nonconsumptive Predator Effects on Prey Populations
Source: PubMed Central journal article supplement (PMC2409076; doi:10.1371/journal.pone.0002465), 2008-06-18
Supplement: pone.0002465.s001.pdf [file pone.0002465.s001.pdf]

| Reference                                              | System      | Predator species (or closest approximation)       | Prey species (or closest approximation)        | Response variables measured    |
|--------------------------------------------------------|-------------|---------------------------------------------------|------------------------------------------------|--------------------------------|
| Abjornsson et al 2002 Freshwater Biology 47: 1489-1495 | Aquatic     | Perca fluviatilis, Eurasian perch                 | non-predatory insects                          | Growth                         |
| Abjornsson et al 2002 Freshwater Biology 47: 1489-1495 | Aquatic     | Perca fluviatilis, Eurasian perch                 | predatory insects                              | Growth                         |
| Allouche & Gaudin 2001 Oikos 94: 481-492               | Aquatic     | Phalacrocorax pygmaeus, pygmy cormorant (stuffed) | Leuciscus cephalus, chub                       | Activity, Growth               |
| Altwegg 2002 Ecology 83(9): 2542-2551                  | Aquatic     | Anax imperator, dragonfly                         | Rana lessonae, pool frog                       | Activity, Growth               |
| Altwegg 2002 Evol Ecol Res 4: 519-536                  | Aquatic     | Anax imperator, dragonfly                         | Rana esculenta, common European frog           | Growth                         |
| Altwegg 2002 Evol Ecol Res 4: 519-536                  | Aquatic     | Anax imperator, dragonfly                         | Rana lessonae, pool frog                       | Growth                         |
| Alvarez & Nicieza 2003 J Fish Biol 63: 1565-1577       | Aquatic     | Salmo trutta, brown trout                         | Salmo trutta, brown trout                      | Habitat use                    |
| Alvarez & Peckarsky 2005 Oecologia 142: 576-587        | Aquatic     | Salvelinus fontinalis, brook trout                | Baetis bicaudatus, mayfly                      | Growth                         |
| Anholt et al 2000 Ecology 81(12): 3509-3521            | Aquatic     | Anax junius, dragonfly                            | Rana catesbeiana, bullfrog                     | Growth                         |
| Anholt et al 2000 Ecology 81(12): 3509-3521            | Aquatic     | Anax junius, dragonfly                            | Rana clamitans, green frog                     | Growth                         |
| Anholt et al 2000 Ecology 81(12): 3509-3521            | Aquatic     | Anax junius, dragonfly                            | Rana pipiens, leopard frog                     | Growth                         |
| Anholt et al 2000 Ecology 81(12): 3509-3521            | Aquatic     | Anax junius, dragonfly                            | Rana sylvatica, wood frog                      | Growth                         |
| Appleton & Palmer 1988 PNAS 85: 4387-4391              | Aquatic     | Cancer productus, red rock crab                   | Nucella lamellosa, gastropod                   | Growth                         |
| Babbitt, K. J. 2001. Can. J. Zoology. 79: 809-814      | Aquatic     | Anax junius, dragonfly                            | Rana sphenoccephala, Southern leopard frog     | Activity, Growth               |
| Ball & Baker 1995 Freshwater Biology 34:1-12           | Aquatic     | Lepomis gibbosus, pumpkinseed sunfish             | Chironomus tentans, midge                      | Growth                         |
| Ball & Baker 1996 Ecology 77:1116-1124                 | Aquatic     | Lepomis gibbosus, pumpkinseed sunfish             | Chironomus tentans, midge                      | Growth                         |
| Banks & Powell 2004 Oikos 106:176-184                  | Terrestrial | Vulpes vulpes, red fox                            | Mus domesticus, house mouse                    | Fecundity                      |
| Barnett & Richardson 2002 Oecologia 132: 436-444       | Aquatic     | Aeshna palmata, paddle-tailed damer               | Rana aurora, red-legged frog                   | Activity, Growth               |
| Barnett & Richardson 2002 Oecologia 132: 436-444       | Aquatic     | Aeshna palmata, paddle-tailed damer               | Rana pretiosa, Oregon spotted frog             | Activity, Growth               |
| Barry 2000 Oecologia 124: 396-401                      | Aquatic     | Anisops gratus, backswimmer                       | Daphnia carinata                               | Fecundity, Growth              |
| Barry 2000 Oecologia 124: 396-401                      | Aquatic     | Anisops gratus, backswimmer                       | Daphnia longicephala                           | Fecundity, Growth              |
| Barry 2000 Oecologia 124: 396-401                      | Aquatic     | Anisops stali, backswimmer                        | Daphnia carinata                               | Fecundity, Growth              |
| Barry 2000 Oecologia 124: 396-401                      | Aquatic     | Anisops stali, backswimmer                        | Daphnia longicephala                           | Fecundity, Growth              |
| Beckerman et al 1997 PNAS 94: 10735-10738              | Terrestrial | Pisurina mira, nursery-web hunting spider         | Melanoplus femurrubrum, red-legged grasshopper | Survival                       |
| Belk 1998 Oecologia 113:203-209                        | Aquatic     | Micropterus salmoides, largemouth bass            | Lepomis macrochirus, bluegill                  | Fecundity, Growth, Habitat use |
| Bernot & Turner 2001 Oecologia 129:139-146             | Aquatic     | Lepomis gibbosus, pumpkinseed sunfish             | Physella integra, snail                        | Habitat use                    |
| Bernot & Turner 2001 Oecologia 129:139-146             | Aquatic     | Orconectes rusticus, crayfish                     | Physella integra, snail                        | Habitat use                    |
| Binckley & Resetarits 2003 Oikos 102:623-629           | Aquatic     | Aphredoderus sayanus, pirate perch                | Hyla chrysoscelis, Copes gray treefrog         | Fecundity                      |
| Binckley & Resetarits 2003 Oikos 102:623-629           | Aquatic     | Gambusia affinis, western mosquitofish            | Hyla chrysoscelis, Copes gray treefrog         | Fecundity                      |
| Binckley et al 2002 Oecologia 130:157-161              | Aquatic     | Enneacanthus obesus, banded sunfish               | Hyla squirella, squirrel treefrog              | Fecundity                      |
| Black & Dodson 1990 Oecologia 83: 117-122              | Aquatic     | Chaoborus americanus, phantom midge               | Daphnia pulex                                  | Fecundity, Growth              |
| Black 1993 Limnol Oceanography 38(5): 986-996          | Aquatic     | Chaoborus americanus, phantom midge               | Daphnia pulex                                  | Fecundity, Growth              |
| Black 1993 Limnol Oceanography 38(5): 986-996          | Aquatic     | Notonecta undulata, backswimmer                   | Daphnia pulex                                  | Fecundity, Growth              |
| Brodin & Johansson 2002 Oecologia 132:316-322          | Aquatic     | Perca fluviatilis, Eurasian perch                 | Lestes sponsa, damselfly                       | Activity, Growth, Survival     |
| Brodin & Johansson 2004 Ecology 85(11): 2927-2932      | Aquatic     | Aeshna juncea, dragonfly                          | Coenagrion hastulatum, damselfly               | Activity, Growth               |
| Brodin et al 2006 Oecologia 148: 162-169               | Aquatic     | Aeshna juncea, dragonfly                          | Coenagrion hastulatum, damselfly               | Activity, Growth, Habitat use  |
| Burks et al 2000 Oikos 88: 139-147                     | Aquatic     | Rutilus rutilus, roach                            | Daphnia magna                                  | Fecundity, Growth              |
| Caro & Castilla 2004 MEPS 276: 115-123                 | Aquatic     | Acanthocyclus gayi, crab                          | Semimytilus algosus, mussel                    | Growth                         |
| Caro & Castilla 2004 MEPS 276: 115-123                 | Aquatic     | Concholepas concholepas                           | Semimytilus algosus, mussel                    | Growth                         |
| Caro & Castilla 2004 MEPS 276: 115-123                 | Aquatic     | Nucella crassilabrum, gastropod                   | Semimytilus algosus, mussel                    | Growth                         |
| Caudill & Peckarsky 2003 Ecology 84(8): 2133-2144      | Aquatic     | Salvelinus fontinalis, brook trout                | Callibaetis ferrugineus hageni, mayfly         | Activity, Growth, Habitat use  |
| Cheung et al 2004 Marine Biology 144: 675-684          | Aquatic     | Thais clavigera                                   | Perna viridis, green mussel                    | Growth, Survival               |
| Cheung et al 2004 Marine Biology 144: 675-684          | Aquatic     | Thalamita danae, swimming crab                    | Perna viridis, green mussel                    | Growth, Survival               |
| Chivers et al 1999 J Chem Ecol 25(11): 2455-2463       | Aquatic     | Notonecta sp., backswimmer                        | Bufo boreas, Western toad                      | Growth, Survival               |
| Chivers et al 2001 Oikos 92: 135-142                   | Aquatic     | Desserobdella picta, leech                        | Hyla regilla, Pacific treefrog                 | Growth, Survival               |
| Chivers et al 2001 Oikos 92: 135-142                   | Aquatic     | Desserobdella picta, leech                        | Rana cascadae, Cascades frog                   | Growth, Survival               |
| Crowder et al 1997 Ecology 78:1796-1804                | Aquatic     | Paralichthys lethostigma, southern flounder       | Leiostomus xanthurus, juvenile spot            | Activity                       |
| Crowder et al 1997 Ecology 78:1796-1804                | Aquatic     | wading birds                                      | Leiostomus xanthurus, juvenile spot            | Activity                       |
| Crowl & Covich 1990 Science 247: 949-951               | Aquatic     | Orconectes virilis, virile crayfish               | Physella virgata virgata, snail                | Growth                         |
| Dahl & Peckarsky 2003 Oecologia 137:188-94             | Aquatic     | Rhinichthys cataractae; Etheostoma flabellare     | Ephemera invaria, mayfly                       | Growth                         |
| Danner & Joern 2003 J Insect Behav 16(4): 453-464      | Terrestrial | Schizocosa sp., lycosid spider                    | Ageneotettix deorum, grasshopper               | Feeding rate                   |

| Reference                                                        | System      | Predator species (or closest approximation)          | Prey species (or closest approximation)                               | Response variables measured    |
|------------------------------------------------------------------|-------------|------------------------------------------------------|-----------------------------------------------------------------------|--------------------------------|
| De Goeij et al 2001 <i>Oecologia</i> 126:500-506                 | Aquatic     | <i>Pleuronectes platessa</i> , plaice (flatfish)     | <i>Macoma balthica</i> , tellinid bivalve                             | Growth                         |
| Delgado et al 2002 <i>Biol Bull</i> 203: 112-120                 | Aquatic     | <i>Panulirus argus</i> , spiny lobster               | <i>Strombus gigas</i> , queen conch                                   | Activity, Growth               |
| Diehl & Eklov 1995 <i>Ecology</i> 76(6): 1712-1726               | Aquatic     | <i>Esox lucius</i> , pike                            | <i>Perca fluviatilis</i> , Eurasian perch                             | Growth, Habitat use            |
| Diehl & Eklov 1995 <i>Ecology</i> 76(6): 1712-1726               | Aquatic     | <i>Perca fluviatilis</i> , Eurasian perch            | <i>Perca fluviatilis</i> , Eurasian perch                             | Growth, Habitat use            |
| Dixon & Agarwala 1999 <i>Proc Roy Soc B</i> 266: 1549-1553       | Terrestrial | <i>Adalia bipunctata</i>                             | <i>Acyrtosiphon pisum</i> , green form of pea aphid                   | Fecundity                      |
| Dixon & Agarwala 1999 <i>Proc Roy Soc B</i> 266: 1549-1553       | Terrestrial | <i>Adalia bipunctata</i>                             | <i>Acyrtosiphon pisum</i> , red form of pea aphid                     | Fecundity                      |
| Dixon & Agarwala 1999 <i>Proc Roy Soc B</i> 266: 1549-1553       | Terrestrial | <i>Adalia bipunctata</i>                             | <i>Aphis fabae fabae</i> , black bean aphid                           | Fecundity                      |
| Dixon & Agarwala 1999 <i>Proc Roy Soc B</i> 266: 1549-1553       | Terrestrial | <i>Adalia bipunctata</i>                             | <i>Meguora viciae</i> , vetch aphid                                   | Fecundity                      |
| Dixon & Baker 1987 <i>Can J Zool</i> 64:2276-2279                | Aquatic     | <i>Lepomis gibbosus</i> , pumpkinseed sunfish        | <i>Ischnura verticalis</i> , damselfly                                | Feeding rate                   |
| Dodson & Havel 1988 <i>Limnol Ocean</i> 33(6, part 1): 1274-1285 | Aquatic     | <i>Notonecta undulata</i> , backswimmer              | <i>Daphnia pulex</i>                                                  | Growth                         |
| Downes 2001 <i>Ecology</i> 82(10):2870-2881                      | Terrestrial | <i>Demansia psammophis</i> , yellow-faced whip snake | <i>Lampropholis guichenoti</i> , garden skink                         | Activity, Growth               |
| Duvall & Williams 1995 <i>Arch fur Hydrobiol</i> 133(3): 273-286 | Aquatic     | <i>Oncorhynchus mykiss</i> , rainbow trout           | <i>Agnetina capitata</i> , stonefly                                   | Activity, Feeding rate, Growth |
| Ejdung 1998 <i>MEPS</i> 165: 137-144                             | Aquatic     | <i>Myoxocephalus scorpius</i> , short-horned sculpin | <i>Saduria entomon</i> , isopod                                       | Habitat use, Survival          |
| Ejdung 1998 <i>MEPS</i> 165: 137-144                             | Aquatic     | <i>Saduria entomon</i> , isopod                      | <i>Monoporeia affinis</i> , amphipod                                  | Activity, Survival             |
| Eklov 2000 <i>Oecologia</i> 123:192-199                          | Aquatic     | <i>Anax junius</i> , dragonfly                       | <i>Rana catesbeiana</i> , bullfrog                                    | Activity, Growth               |
| Eklov 2000 <i>Oecologia</i> 123:192-199                          | Aquatic     | <i>Lepomis macrochirus</i> , bluegill                | <i>Rana catesbeiana</i> , bullfrog                                    | Activity, Growth               |
| Feltmate & Williams 1989 <i>Can J Fish Aq Sci</i> 46: 1575-1580  | Aquatic     | <i>Oncorhynchus mykiss</i> , rainbow trout           | <i>Paragnetina media</i> , stonefly                                   | Feeding rate                   |
| Fraser & Gilliam 1992 <i>Ecology</i> 73:959-970                  | Aquatic     | <i>Hoplias malabaricus</i> , tiger fish              | <i>Rivulus hartii</i> , jumping gubaine                               | Fecundity, Growth              |
| Fuelling & Halle 2004 <i>Oecologia</i> 138: 151-159              | Terrestrial | <i>Mustela nivalis nivalis</i> , least weasel        | <i>Clethrionomys rufocanus</i> , grey-sided vole                      | Fecundity                      |
| Gliwicz 1994 <i>Oecologia</i> 97: 458-461                        | Aquatic     | <i>Acanthocyclops robustus</i> , copepod             | <i>Ceriodaphnia reticulata</i>                                        | Growth                         |
| Gliwicz 1994 <i>Oecologia</i> 97: 458-461                        | Aquatic     | <i>Acanthocyclops robustus</i> , copepod             | <i>Daphnia hyalina</i>                                                | Growth                         |
| Gliwicz 1994 <i>Oecologia</i> 97: 458-461                        | Aquatic     | <i>Acanthocyclops robustus</i> , copepod             | <i>Daphnia magna</i>                                                  | Growth                         |
| Gliwicz 1994 <i>Oecologia</i> 97: 458-461                        | Aquatic     | <i>Acanthocyclops robustus</i> , copepod             | <i>Daphnia pulicaria</i>                                              | Growth                         |
| Gotceitas 1990 <i>Oecologia</i> 83: 346-351                      | Aquatic     | <i>Micropterus salmoides</i> , largemouth bass       | <i>Lepomis macrochirus</i> , bluegill                                 | Feeding rate                   |
| Grabowski & Kimbro 2005 <i>Ecology</i> 86(5): 1312-1319          | Aquatic     | <i>Opsanus tau</i> , oyster toadfish                 | <i>Panopeus herbstii</i> , mud crab                                   | Habitat use, Survival          |
| Grabowski 2004 <i>Ecology</i> 85(4): 995-1004                    | Aquatic     | <i>Opsanus tau</i> , oyster toadfish                 | <i>Panopeus herbstii</i> , mud crab                                   | Survival                       |
| Grill & Moore 1998 <i>Oecologia</i> 114: 274-282                 | Terrestrial | simulated                                            | <i>Harmonia axyridis</i> , aposematic ladybird beetle                 | Growth                         |
| Hanazato & Dodson 1992 <i>J Plank Res</i> 14(12): 1743-1755      | Aquatic     | <i>Chaoborus americanus</i> , phantom midge          | <i>Daphnia pulex</i>                                                  | Fecundity, Growth              |
| Hanazato 1995 <i>Jpn J Limnol</i> 56(1): 27-32                   | Aquatic     | <i>Lepomis macrochirus</i> , bluegill                | <i>Daphnia ambigua</i>                                                | Fecundity, Growth              |
| Hanazato 1995 <i>Jpn J Limnol</i> 56(1): 27-32                   | Aquatic     | <i>Lepomis macrochirus</i> , bluegill                | <i>Daphnia galeata</i>                                                | Fecundity, Growth              |
| Harvey 1991 <i>Oecologia</i> 87:29-36                            | Aquatic     | <i>Micropterus salmoides</i> , largemouth bass       | <i>Lepomis sp.</i> , sunfish                                          | Survival                       |
| Havel & Dodson 1987 <i>Hydrobiologia</i> 150: 273-281            | Aquatic     | <i>Chaoborus americanus</i> , phantom midge          | <i>Daphnia pulex</i>                                                  | Fecundity, Growth              |
| Heads 1986 <i>Ecol Ent</i> 11: 369-377                           | Aquatic     | <i>Corixa punctata</i> , water boatman               | <i>Ischnura elegans</i> , damselfly                                   | Feeding rate                   |
| Heads 1986 <i>Ecol Ent</i> 11: 369-377                           | Aquatic     | <i>Leuciscus cephalus</i> , chub                     | <i>Ischnura elegans</i> , damselfly                                   | Feeding rate                   |
| Heads 1986 <i>Ecol Ent</i> 11: 369-377                           | Aquatic     | <i>Notonecta glauca</i> , backswimmer                | <i>Ischnura elegans</i> , damselfly                                   | Feeding rate                   |
| Hechtel & Juliano 1997 <i>Ecology</i> 78(3): 838-851             | Aquatic     | <i>Toxorhynchites rutilus</i> , predatory mosquito   | <i>Aedes triseriatus</i> , tree-hole mosquito                         | Activity, Growth               |
| Heikkala et al 1993 <i>Ann Zool Fennici</i> 30:153-161           | Terrestrial | <i>Mustela nivalis nivalis</i> , least weasel        | <i>Clethrionomys glareolus</i> , bank vole                            | Growth                         |
| Heikkala et al 1993 <i>Ann Zool Fennici</i> 30:153-161           | Terrestrial | <i>Mustela nivalis nivalis</i> , least weasel        | <i>Clethrionomys rufocanus</i> , grey-sided vole                      | Growth                         |
| Heikkala et al 1993 <i>Ann Zool Fennici</i> 30:153-161           | Terrestrial | <i>Mustela nivalis nivalis</i> , least weasel        | <i>Clethrionomys rutilus</i> , red vole                               | Fecundity, Growth              |
| Hellstedt et al 2002 <i>Ann Zool Fenn</i> 39: 257-265            | Terrestrial | <i>Mustela nivalis</i> , least weasel                | <i>Microtus agrestis</i> , field vole                                 | Activity, Fecundity, Growth    |
| Hill & Lodge 1995 <i>JNABS</i> 14(2): 306-314                    | Aquatic     | <i>Micropterus salmoides</i> , largemouth bass       | <i>Orconectes rusticus</i> , <i>O. propinquus</i> , <i>O. virilis</i> | Survival                       |
| Hill & Lodge 1999 <i>Ecol Appl</i> 9(2): 678-690                 | Aquatic     | <i>Micropterus salmoides</i> , largemouth bass       | <i>Orconectes propinquus</i> , crayfish                               | Growth, Survival               |
| Hill & Lodge 1999 <i>Ecol Appl</i> 9(2): 678-690                 | Aquatic     | <i>Micropterus salmoides</i> , largemouth bass       | <i>Orconectes rusticus</i> , crayfish                                 | Growth, Survival               |
| Hill & Lodge 1999 <i>Ecol Appl</i> 9(2): 678-690                 | Aquatic     | <i>Micropterus salmoides</i> , largemouth bass       | <i>Orconectes virilis</i> , virile crayfish                           | Growth, Survival               |
| Holomuzki & Hatchett 1994 <i>Freshwater Biology</i> 32: 585-592  | Aquatic     | <i>Lepomis megalotis</i> , longear sunfish           | <i>Lirceus fontinalis</i> , isopod                                    | Growth                         |
| Huang & Sih 1991 <i>Oecologia</i> 85:530-536                     | Aquatic     | <i>Lepomis cyanellus</i> , green sunfish             | <i>Ambystoma barbouri</i> , streamside salamander                     | Feeding rate, Survival         |
| Jackson & Semlitsch 1993 <i>Ecology</i> 74:342-350               | Aquatic     | <i>Lepomis macrochirus</i> , bluegill                | <i>Ambystoma talpoideum</i> , mole salamander                         | Growth, Habitat use, Survival  |
| Jeffries 1990 <i>Freshwater Biology</i> 23: 191-196              | Aquatic     | <i>Aeshna juncea</i> , dragonfly                     | <i>Enallagma cyathigerum</i> , damselfly                              | Survival                       |
| Jeffries 1990 <i>Freshwater Biology</i> 23: 191-196              | Aquatic     | <i>Aeshna juncea</i> , dragonfly                     | <i>Lestes sponsa</i> , damselfly                                      | Survival                       |
| Johansson 2002 <i>Can J Zool</i> 80: 944-950                     | Aquatic     | <i>Perca fluviatilis</i> , Eurasian perch            | <i>Leucorhinia dubia</i> , dragonfly                                  | Growth                         |
| Johansson et al 2001 <i>Ecology</i> 82(7): 1857-1869             | Aquatic     | <i>Perca fluviatilis</i> , Eurasian perch            | <i>Lestes sponsa</i> , damselfly                                      | Growth                         |

| Reference                                             | System      | Predator species (or closest approximation)      | Prey species (or closest approximation)        | Response variables measured    |
|-------------------------------------------------------|-------------|--------------------------------------------------|------------------------------------------------|--------------------------------|
| Johnson et al 2003 Can J Zool 81: 1608-1613           | Aquatic     | Anax junius, dragonfly                           | Rana spenocephala, Southern leopard frog       | Growth                         |
| Johnson et al 2003 Can J Zool 81: 1608-1613           | Aquatic     | Cybister sp., dytiscid beetle                    | Rana spenocephala, Southern leopard frog       | Growth                         |
| Johnson et al 2003 Can J Zool 81: 1608-1613           | Aquatic     | Procambarus nigrocinctus, crayfish               | Rana spenocephala, Southern leopard frog       | Growth                         |
| Jones et al 2003 Oikos 102: 155-163                   | Aquatic     | Lota lota, burbot                                | Salmo salar, atlantic salmon                   | Growth                         |
| Jones et al 2003 Oikos 102: 155-163                   | Aquatic     | Salmo trutta, brown trout                        | Salmo salar, atlantic salmon                   | Growth                         |
| Justome et al 1998 Veliger 41(2): 172-179             | Aquatic     | Leptasteria polaris, starfish                    | Buccinum undatum, whelk                        | Activity, Growth               |
| Ketola & Vuorinen 1989 Hydrobiologia 179: 149-155     | Aquatic     | Chaoborus sp., midge                             | Daphnia magna                                  | Fecundity                      |
| Ketola & Vuorinen 1989 Hydrobiologia 179: 149-155     | Aquatic     | Chaoborus sp., midge                             | Daphnia pulex                                  | Fecundity, Growth              |
| Kiesecker et al 2002 J Chem Ecol 28(5): 1017-1015     | Aquatic     | Taricha granulosa, rough-skinned newt            | Rana aurora, red-legged frog                   | Growth                         |
| Klemola et al 1998 Oecologia 115:149-153              | Terrestrial | Falco tinnunculus, Eurasian kestrel              | Clethrionomys glareolus, bank vole             | Fecundity                      |
| Klemola et al 1998 Oecologia 115:149-153              | Terrestrial | Falco tinnunculus, Eurasian kestrel              | Microtus agrestis, field vole                  | Fecundity                      |
| Kohler & McPeck 1989 Ecology 70(6): 1811-1825         | Aquatic     | Cottus bairdi, mottled sculpin                   | Baetis tricaudatus, mayfly                     | Habitat use                    |
| Kohler & McPeck 1989 Ecology 70(6): 1811-1825         | Aquatic     | Cottus bairdi, mottled sculpin                   | Glossosoma nigrior, caddisfly                  | Activity                       |
| Koskela & Ylonen 1995 Behav Ecol 6(3): 311-315        | Terrestrial | Mustela nivalis and Mustela vison                | Microtus agrestis, field vole                  | Activity, Fecundity            |
| Kraft et al 2005 Austral Ecology 30: 558-563          | Aquatic     | Anax brevistyla, dragonfly                       | Limnodynastes peronii, striped marsh frog      | Growth                         |
| Kusch & Chivers 2004 Can. J. Zool. 82: 917-921        | Aquatic     | Orconectes virilis, virile crayfish              | Pimephales promelas, fathead minnow            | Growth                         |
| LaFiandra & Babbitt 2004 Oecologia 138: 350-359       | Aquatic     | Anax junius, dragonfly                           | Hyla femoralis, pinewoods treefrog             | Growth, Survival               |
| Lane & Mahoney 2002 J Animal Ecol 71: 780-792         | Aquatic     | Gambusia holbrooki, mosquitofish                 | Crinia signifera, eastern brown froglet        | Feeding rate, Growth, Survival |
| Lane & Mahoney 2002 J Animal Ecol 71: 780-792         | Aquatic     | Gambusia holbrooki, mosquitofish                 | Limnodynastes tasmaniensis, spotted marsh frog | Feeding rate, Growth, Survival |
| Langerhans & Dewitt 2002 Evol Ecol Res 6: 857-870     | Aquatic     | Lepomis gibbosus, pumpkinseed sunfish            | Physella virgata, snail                        | Growth                         |
| Lardner 2000 Oikos 88:169-180                         | Aquatic     | Dytiscus marginalis, diving beetle               | Bufo bufo, common toad                         | Growth                         |
| Lardner 2000 Oikos 88:169-180                         | Aquatic     | Dytiscus marginalis, diving beetle               | Bufo calamita, natterjack toad                 | Growth                         |
| Lardner 2000 Oikos 88:169-180                         | Aquatic     | Dytiscus marginalis, diving beetle               | Hyla arborea, common treefrog                  | Growth                         |
| Lardner 2000 Oikos 88:169-180                         | Aquatic     | Dytiscus marginalis, diving beetle               | Pelobates fuscus, garlic toad                  | Growth                         |
| Lardner 2000 Oikos 88:169-180                         | Aquatic     | Dytiscus marginalis, diving beetle               | Rana arvalis, moor frog                        | Growth                         |
| Lardner 2000 Oikos 88:169-180                         | Aquatic     | Dytiscus marginalis, diving beetle               | Rana dalmatina, agile frog                     | Growth                         |
| Lardner 2000 Oikos 88:169-180                         | Aquatic     | Dytiscus marginalis, diving beetle               | Rana temporaria, common frog                   | Growth                         |
| Laurila & Kujasalo 1999 J Animal Ecol 68: 1123-1132   | Aquatic     | Aeshna juncea, dragonfly                         | Rana temporaria, common frog                   | Activity, Growth               |
| Laurila et al 1998 Oikos 83: 307-317                  | Aquatic     | Aeshna juncea, dragonfly                         | Bufo bufo, common toad                         | Growth, Survival               |
| Laurila et al 1998 Oikos 83: 307-317                  | Aquatic     | Aeshna juncea, dragonfly                         | Rana temporaria, common frog                   | Activity, Growth, Survival     |
| Laurila et al 2004 Oikos 107:90-99                    | Aquatic     | Aeshna sp., dragonfly                            | Rana temporaria, common frog                   | Activity, Growth               |
| Laurila et al 2006 Oecologia 147(4): 585-595          | Aquatic     | Aeshna cyanea, dragonfly                         | Rana arvalis, moor frog                        | Activity, Growth               |
| Laurila et al 2006 Oecologia 147(4): 585-595          | Aquatic     | Gasterosteus aculeatus, three-spined stickleback | Rana arvalis, moor frog                        | Activity, Growth               |
| Laurila et al 2006 Oecologia 147(4): 585-595          | Aquatic     | Triturus vulgaris, smooth newt                   | Rana arvalis, moor frog                        | Activity, Growth               |
| Lefcort et al 1999 Ecol Appl 9(4): 1477-1489          | Aquatic     | Lepomis macrochirus, bluegill                    | Lymnaea palustris, snail                       | Activity                       |
| Lefcort et al 1999 Ecol Appl 9(4): 1477-1489          | Aquatic     | Lepomis macrochirus, bluegill                    | Rana luteiventris, Columbia spotted frog       | Activity                       |
| Lewis 2001 Ecology 82(3): 758-765                     | Aquatic     | Orconectes rusticus, crayfish                    | Amnicola limosa, snail                         | Growth                         |
| Li & Jackson 2005 J Chem Ecol 31(2): 333-342          | Terrestrial | Portia labiata, spider-eating jumping spider     | Scytodes pallida, egg-carrying spitting spider | Growth, Survival               |
| Li 2002 Proc R Soc Lond Ser B 269: 2155-2161          | Terrestrial | Portia labiata, spider-eating jumping spider     | Scytodes pallida, egg-carrying spitting spider | Growth, Survival               |
| Lilliendahl 1997 Animal Behav 53: 75-81               | Terrestrial | Accipiter nisus, sparrowhawk (stuffed bird)      | Carduelis chloris, greenfinch                  | Activity, Growth               |
| Lilliendahl 1998 Animal Behav 55: 1335-1340           | Terrestrial | Accipiter nisus, sparrowhawk (stuffed bird)      | Emberiza citrinella, yellowhammer              | Growth                         |
| Linden et al 2003 Marine Biol 143: 845-850            | Aquatic     | Perca fluviatilis, Eurasian perch                | Neomysis integer, mysid shrimp                 | Feeding rate, Habitat use      |
| Linden et al 2003 Marine Biol 143: 845-850            | Aquatic     | Perca fluviatilis, Eurasian perch                | Praunus flexuosus, mysid shrimp                | Feeding rate, Habitat use      |
| Loose & Dawidowicz 1994 Ecology 75(8): 2255-2263      | Aquatic     | Leucaspis delinatus, sunbleak                    | Daphnia magna                                  | Growth                         |
| Lopez et al 1995 Rev Chilena Hist Nat 68: 469-475     | Aquatic     | Nucella crassilabrum, gastropod                  | Peromytilus purpuratus, mussel                 | Survival                       |
| Luning 1992 Oecologia 92: 383-390                     | Aquatic     | Chaoborus flavicans and Notonecta glauca         | Daphnia pulex                                  | Fecundity                      |
| Luning 1992 Oecologia 92: 383-390                     | Aquatic     | Chaoborus flavicans, phantom midge               | Daphnia pulex                                  | Growth                         |
| Luning 1992 Oecologia 92: 383-390                     | Aquatic     | Notonecta glauca, backswimmer                    | Daphnia pulex                                  | Fecundity, Growth              |
| Luning 1994 Oikos 69: 427-436                         | Aquatic     | Chaoborus flavicans, phantom midge               | Daphnia pulex                                  | Fecundity, Growth              |
| Luning 1995 J Plankton Res 17(1): 71-84               | Aquatic     | Chaoborus flavicans, phantom midge               | Daphnia pulex                                  | Fecundity                      |
| Macchiusi & Baker 1992 Freshwater Biology 28: 207-216 | Aquatic     | Lepomis gibbosus, pumpkinseed sunfish            | Chironomus tentans, midge                      | Activity, Growth               |

| Reference                                                    | System      | Predator species (or closest approximation)               | Prey species (or closest approximation)            | Response variables measured              |
|--------------------------------------------------------------|-------------|-----------------------------------------------------------|----------------------------------------------------|------------------------------------------|
| Machacek 1993 <i>Limnol Oceanography</i> 38(7): 1544-1550    | Aquatic     | <i>Rutilus rutilus</i> , roach                            | <i>Daphnia galeata</i>                             | Fecundity, Growth                        |
| Machacek 1993 <i>Limnol Oceanography</i> 38(7): 1544-1550    | Aquatic     | <i>Rutilus rutilus</i> , roach                            | <i>Daphnia obtusa</i>                              | Fecundity, Growth                        |
| Machacek 1995 <i>J Plankton Res</i> 17(7): 1513-1520         | Aquatic     | <i>Rutilus rutilus</i> , roach                            | <i>Daphnia galeata</i>                             | Fecundity, Growth                        |
| Magnhagen 1990 <i>Behav Ecol Sociobol</i> 26:331-335         | Aquatic     | <i>Gadus morhua</i> , cod                                 | <i>Gobus niger</i> , black goby                    | Fecundity                                |
| Magnhagen 1990 <i>Behav Ecol Sociobol</i> 26:331-335         | Aquatic     | <i>Gadus morhua</i> , cod                                 | <i>Pomatoschistus minutus</i> , sand goby          | Fecundity                                |
| Mappes et al 1998 <i>Oikos</i> 82: 365-369                   | Terrestrial | <i>Mustela nivalis nivalis</i> , least weasel             | <i>Clethrionomys glareolus</i> , bank vole         | Fecundity                                |
| Martin & Lopez 1999 <i>Oikos</i> 84: 499-505                 | Terrestrial | <i>Homo sapiens</i> , an implacable enemy of wall lizards | <i>Podarcis muralis</i> , wall lizard              | Habitat use                              |
| McCollum & Leimberger 1997 <i>Oecologia</i> 109: 615-621     | Aquatic     | <i>Anax umbrosa</i> , dragonfly                           | <i>Hyla chrysoscelis</i> , Copes gray treefrog     | Growth                                   |
| McCollum & Van Buskirk 1996 <i>Evolution</i> 50(2): 583-593  | Aquatic     | <i>Anax junius</i> , dragonfly                            | <i>Hyla chrysoscelis</i> , Copes gray treefrog     | Activity, Feeding rate, Growth, Survival |
| McIntosh & Townsend 1996 <i>Oecologia</i> 108: 174-181       | Aquatic     | <i>Galaxias vulgaris</i> , river galaxia                  | <i>Deleatidium</i> sp., mayfly                     | Habitat use                              |
| McIntosh & Townsend 1996 <i>Oecologia</i> 108: 174-181       | Aquatic     | <i>Salmo trutta</i> , brown trout                         | <i>Deleatidium</i> sp., mayfly                     | Habitat use                              |
| McIntosh et al 2004 <i>Ecology</i> 85(8): 2279-2290          | Aquatic     | <i>Salvelinus fontinalis</i> , brook trout                | <i>Baetis bicaudatus</i> , mayfly                  | Activity                                 |
| McIntyre et al 2004 <i>Oecologia</i> 141:130-138             | Aquatic     | <i>Belostoma malkini</i> , waterbug                       | <i>Rana palmipes</i> , web-footed frog             | Growth, Habitat use, Survival            |
| McNeely et al 1990 <i>Oecologia</i> 85: 69-73                | Aquatic     | <i>Micropterus dolomieu</i> , smallmouth bass             | <i>Orconectes putnami</i> and <i>Cottus bairdi</i> | Habitat use                              |
| McPeck et al 2001 <i>Ecology</i> 82(6): 1535-1545            | Aquatic     | <i>Lepomis gibbosus</i> , pumpkinseed sunfish             | <i>Enallagma divagans</i> , damselfly              | Growth                                   |
| McPeck et al 2001 <i>Ecology</i> 82(6): 1535-1545            | Aquatic     | <i>Lepomis gibbosus</i> , pumpkinseed sunfish             | <i>Enallagma laterale</i> , damselfly              | Growth                                   |
| McPeck et al 2001 <i>Ecology</i> 82(6): 1535-1545            | Aquatic     | <i>Lepomis gibbosus</i> , pumpkinseed sunfish             | <i>Ischnura verticalis</i> , damselfly             | Growth                                   |
| Mikolajewski et al 2005 <i>Oikos</i> 110(1): 91-100          | Aquatic     | <i>Aeshna cyanea</i> , dragonfly                          | <i>Coenagrion puella</i> , damselfly               | Activity, Growth                         |
| Moore et al 1996 <i>Oikos</i> 77: 331-335                    | Aquatic     | <i>Lepomis cyanellus</i> , green sunfish                  | <i>Ambystoma barbouri</i> , streamside salamander  | Growth                                   |
| Morrison 1999 <i>Oecologia</i> 121:113-122                   | Terrestrial | <i>Pseudacteon browni</i> , phorid fly                    | <i>Solenopsis geminata</i> , fire ant              | Feeding rate                             |
| Moses & Sih 1998 <i>Ethology</i> 104:661-669                 | Aquatic     | <i>Notonecta undulata</i> , backswimmer                   | <i>Gerris marginatus</i> , pond water strider      | Activity, Fecundity, Habitat use         |
| Nakaoka 2000 <i>Ecology</i> 81(4):1031-1045                  | Aquatic     | <i>Busycyon caria</i> , whelk                             | <i>Mercenaria mercenaria</i> , clam                | Growth                                   |
| Nicieza 2000 <i>Oecologia</i> 123: 497-505                   | Aquatic     | <i>Salmo salar</i> , atlantic salmon                      | <i>Rana temporaria</i> , common frog               | Growth, Habitat use                      |
| Nystrom & Abjornsson 2000 <i>Oikos</i> 88:181-190            | Aquatic     | <i>Oncorhynchus mykiss</i> , rainbow trout                | <i>Bufo bufo</i> , common toad                     | Habitat use, Survival                    |
| Nystrom & Abjornsson 2000 <i>Oikos</i> 88:181-190            | Aquatic     | <i>Oncorhynchus mykiss</i> , rainbow trout                | <i>Rana temporaria</i> , common frog               | Habitat use, Survival                    |
| Oku et al 2004 <i>J Ethology</i> 22:109-112                  | Terrestrial | <i>Amblyseius womersleyi</i> , predatory mite             | <i>Tetranychus kanzawai</i> , phytophagous mite    | Fecundity                                |
| Orizaola & Brana 2005 <i>Freshwater Biology</i> 50:438-446   | Aquatic     | <i>Salmo trutta</i> , brown trout                         | <i>Triturus helveticus</i> , palmate newt          | Growth                                   |
| Oriziola and Brana 2004 <i>Ann. Zool. Fennici</i> 41:635-645 | Aquatic     | <i>Salmo trutta</i> , brown trout                         | <i>Triturus alpestris</i> , alpine newt            | Growth, Survival                         |
| Oriziola and Brana 2004 <i>Ann. Zool. Fennici</i> 41:635-645 | Aquatic     | <i>Salmo trutta</i> , brown trout                         | <i>Triturus boscai</i> , newt                      | Growth, Survival                         |
| Oriziola and Brana 2004 <i>Ann. Zool. Fennici</i> 41:635-645 | Aquatic     | <i>Salmo trutta</i> , brown trout                         | <i>Triturus helveticus</i> , palmate newt          | Growth, Survival                         |
| Oriziola and Brana 2004 <i>Ann. Zool. Fennici</i> 41:635-645 | Aquatic     | <i>Salmo trutta</i> , brown trout                         | <i>Triturus marmoratus</i> , newt                  | Growth, Survival                         |
| Palmer 1990 <i>Hydrobiologia</i> 193: 155-182                | Aquatic     | <i>Cancer pagurus</i> , crab                              | <i>Nucella lapillus</i> , Atlantic dogwhelk        | Growth                                   |
| Peacor & Werner 1997 <i>Ecology</i> 78:1446-1156             | Aquatic     | <i>Anax longipes</i> , comet darner                       | <i>Rana catesbeiana</i> , bullfrog                 | Growth                                   |
| Peacor & Werner 1997 <i>Ecology</i> 78:1446-1156             | Aquatic     | <i>Anax longipes</i> , comet darner                       | <i>Rana clamitans</i> , green frog                 | Growth                                   |
| Peacor & Werner 2000 <i>Ecology</i> 81(7):1998-2010          | Aquatic     | <i>Anax longipes</i> , comet darner                       | <i>Rana catesbeiana</i> , bullfrog                 | Growth                                   |
| Peacor & Werner 2000 <i>Ecology</i> 81(7):1998-2010          | Aquatic     | <i>Anax longipes</i> , comet darner                       | <i>Rana clamitans</i> , green frog                 | Growth                                   |
| Peacor & Werner 2004 <i>Is. J. Zool</i> 50:139-167           | Aquatic     | <i>Anax junius</i> , dragonfly                            | <i>Rana sylvatica</i> , wood frog                  | Growth                                   |
| Peacor 2002 <i>Ecology Letters</i> 5:77-85                   | Aquatic     | <i>Anax</i> sp., dragonfly                                | <i>Rana catesbeiana</i> , bullfrog                 | Activity, Growth                         |
| Peckarsky 1996 <i>Ecology</i> 77(6): 1888-1905               | Aquatic     | <i>Kogotus modestus</i> , stonefly                        | <i>Baetis bicaudatus</i> , mayfly                  | Habitat use                              |
| Peckarsky 1996 <i>Ecology</i> 77(6): 1888-1905               | Aquatic     | <i>Kogotus modestus</i> , stonefly                        | <i>Cinygmula</i> sp., mayfly                       | Feeding rate                             |
| Peckarsky 1996 <i>Ecology</i> 77(6): 1888-1905               | Aquatic     | <i>Kogotus modestus</i> , stonefly                        | <i>Epeorus deceptivus</i> , mayfly                 | Feeding rate, Habitat use                |
| Peckarsky 1996 <i>Ecology</i> 77(6): 1888-1905               | Aquatic     | <i>Megarcys signata</i> , stonefly                        | <i>Baetis bicaudatus</i> , mayfly                  | Habitat use                              |
| Peckarsky 1996 <i>Ecology</i> 77(6): 1888-1905               | Aquatic     | <i>Megarcys signata</i> , stonefly                        | <i>Cinygmula</i> sp., mayfly                       | Feeding rate                             |
| Peckarsky 1996 <i>Ecology</i> 77(6): 1888-1905               | Aquatic     | <i>Megarcys signata</i> , stonefly                        | <i>Epeorus longimanus</i> , mayfly                 | Feeding rate, Habitat use                |
| Peckarsky 1996 <i>Ecology</i> 77(6): 1888-1905               | Aquatic     | <i>Megarcys signata</i> , stonefly                        | <i>Ephemera</i> sp., mayfly                        | Feeding rate                             |
| Peckarsky et al 1993 <i>Ecology</i> 74:1836-1846             | Aquatic     | <i>Kogotus modestus</i> , stonefly                        | <i>Baetis bicaudatus</i> , mayfly                  | Feeding rate                             |
| Peckarsky et al 1993 <i>Ecology</i> 74:1836-1846             | Aquatic     | <i>Megarcys signata</i> , stonefly                        | <i>Baetis bicaudatus</i> , mayfly                  | Fecundity, Feeding rate, Growth          |
| Peckarsky et al 2002 <i>Ecology</i> 83(3): 612-618           | Aquatic     | <i>Salvelinus fontinalis</i> , brook trout                | <i>Baetis bicaudatus</i> , mayfly                  | Growth                                   |
| Persons et al 2002 <i>Behav Ecol</i> 13(3): 386-392          | Terrestrial | <i>Hogna helluo</i> , wolf spider                         | <i>Pardosa milvina</i> , wolf spider               | Fecundity, Survival                      |
| Petranka & Fakhoury 1991 <i>Copeia</i> 1: 234-239            | Aquatic     | <i>Lepomis macrochirus</i> , bluegill                     | <i>Anopheles</i> sp., mosquito                     | Fecundity                                |
| Petranka & Fakhoury 1991 <i>Copeia</i> 1: 234-239            | Aquatic     | <i>Lepomis macrochirus</i> , bluegill                     | <i>Chaoborus</i> sp., midge                        | Fecundity                                |

| Reference                                                      | System      | Predator species (or closest approximation)                                     | Prey species (or closest approximation)              | Response variables measured |
|----------------------------------------------------------------|-------------|---------------------------------------------------------------------------------|------------------------------------------------------|-----------------------------|
| Pierce 1988 <i>Oecologia</i> 77: 81-90                         | Aquatic     | <i>Lepomis macrochirus</i> , bluegill                                           | <i>Ladona deplanata</i> , dragonfly                  | Habitat use                 |
| Pierce 1988 <i>Oecologia</i> 77: 81-90                         | Aquatic     | <i>Lepomis macrochirus</i> , bluegill                                           | <i>Sympetrum semicinctum</i> , dragonfly             | Habitat use                 |
| Pierce 1988 <i>Oecologia</i> 77: 81-90                         | Aquatic     | <i>Lepomis macrochirus</i> , bluegill                                           | <i>Tetragoneuria cynosura</i> , dragonfly            | Habitat use                 |
| Pravosudov & Grubb 1998 <i>Animal Behav</i> 56: 49-54          | Terrestrial | <i>Accipiter striatus</i> , sharp-shinned hawk                                  | <i>Baelophus bicolor</i> , tufted titmouse           | Growth                      |
| Pusenius & Ostfeld 2000 <i>Oikos</i> 91(1): 123-130            | Terrestrial | <i>Mustela erminea</i> , stoat                                                  | <i>Microtus pennsylvanicus</i> , meadow vole         | Survival                    |
| Pusenius & Ostfeld 2002 <i>Ecography</i> 25: 481-87            | Terrestrial | urine/feces of <i>Vulpes vulpes</i> , <i>Canis latrans</i> , <i>Felix rufus</i> | <i>Microtus pennsylvanicus</i> , meadow vole         | Feeding rate, Survival      |
| Rahel & Stein 1988 <i>Oecologia</i> 75:9498                    | Aquatic     | <i>Micropterus dolomieu</i> , smallmouth bass                                   | <i>Etheostoma nigrum</i> , johnny darter             | Habitat use                 |
| Rahel & Stein 1988 <i>Oecologia</i> 75:9498                    | Aquatic     | <i>Orconectes rusticus</i> , crayfish                                           | <i>Etheostoma nigrum</i> , johnny darter             | Habitat use                 |
| Rasmy et al 1990 <i>Ept. &amp; Appl. Acarology</i> 10: 151-155 | Terrestrial | <i>Amblyseius gossipi</i> , predatory mite                                      | <i>Tetranychus urticae</i> , two-spotted spider mite | Fecundity                   |
| Rasmy et al 1990 <i>Ept. &amp; Appl. Acarology</i> 10: 151-155 | Terrestrial | <i>Phytoseiulus finitimus</i> , predatory mite                                  | <i>Tetranychus urticae</i> , two-spotted spider mite | Fecundity                   |
| Rasmy et al 1990 <i>Ept. &amp; Appl. Acarology</i> 10: 151-155 | Terrestrial | <i>Phytoseiulus persimilis</i> , predatory mite                                 | <i>Tetranychus urticae</i> , two-spotted spider mite | Fecundity                   |
| Rawlings 1994 <i>JEMBE</i> 181: 67-79                          | Aquatic     | <i>Cancer productus</i> , red rock crab                                         | <i>Nuccella emarginata</i> , snail                   | Fecundity, Growth           |
| Reede & Ringelberg 1995 <i>Hydrobiologia</i> 307: 207-212      | Aquatic     | <i>Perca fluviatilis</i> , Eurasian perch                                       | <i>Daphnia hyalina x galeata</i>                     | Growth                      |
| Reede 1995 <i>J Plankton Res</i> 17(8): 1661-1667              | Aquatic     | <i>Perca fluviatilis</i> , Eurasian perch                                       | <i>Daphnia hyalina x galeata</i>                     | Fecundity, Growth, Survival |
| Reede 1997 <i>Freshwater Biol</i> 37: 389-396                  | Aquatic     | <i>Perca fluviatilis</i> , Eurasian perch                                       | <i>Daphnia hyalina x galeata</i>                     | Fecundity, Growth           |
| Reimer & Harms-Ringdahl 2001 <i>Mar Biol</i> 139: 959-965      | Aquatic     | <i>Asterias rubens</i> , starfish                                               | <i>Mytilus edulis</i> , blue mussel                  | Growth                      |
| Reimer & Harms-Ringdahl 2001 <i>Mar Biol</i> 139: 959-965      | Aquatic     | <i>Carcinus maenas</i> , green crab                                             | <i>Mytilus edulis</i> , blue mussel                  | Growth                      |
| Reimer & Tedergren 1996 <i>Oikos</i> 75: 383-390               | Aquatic     | <i>Asterias rubens</i> , starfish                                               | <i>Mytilus edulis</i> , blue mussel                  | Growth                      |
| Reimer et al 1995 <i>Mar Fresh Behav Physiol</i> 25: 233-244   | Aquatic     | <i>Asterias rubens</i> , starfish                                               | <i>Mytilus edulis</i> , blue mussel                  | Feeding rate, Growth        |
| Relyea & Hoverman 2003 <i>Oecologia</i> 134:596-604.           | Aquatic     | <i>Anax</i> sp., dragonfly                                                      | <i>Hyla versicolor</i> , gray treefrog               | Growth                      |
| Relyea & Werner 1999 <i>Ecology</i> 80(6): 2117-2124           | Aquatic     | <i>Anax</i> sp., dragonfly                                                      | <i>Rana catesbeiana</i> , bullfrog                   | Activity, Growth            |
| Relyea & Werner 1999 <i>Ecology</i> 80(6): 2117-2124           | Aquatic     | <i>Anax</i> sp., dragonfly                                                      | <i>Rana clamitans</i> , green frog                   | Activity, Growth            |
| Relyea & Werner 1999 <i>Ecology</i> 80(6): 2117-2124           | Aquatic     | <i>Lepomis macrochirus</i> , bluegill                                           | <i>Rana catesbeiana</i> , bullfrog                   | Activity, Growth            |
| Relyea & Werner 1999 <i>Ecology</i> 80(6): 2117-2124           | Aquatic     | <i>Lepomis macrochirus</i> , bluegill                                           | <i>Rana clamitans</i> , green frog                   | Activity, Growth            |
| Relyea & Werner 1999 <i>Ecology</i> 80(6): 2117-2124           | Aquatic     | <i>Umbra limi</i> , mudminnow                                                   | <i>Rana catesbeiana</i> , bullfrog                   | Activity, Growth            |
| Relyea & Werner 1999 <i>Ecology</i> 80(6): 2117-2124           | Aquatic     | <i>Umbra limi</i> , mudminnow                                                   | <i>Rana clamitans</i> , green frog                   | Activity, Growth            |
| Relyea & Werner 2000 <i>Copeia</i> 2000(1): 178-190            | Aquatic     | <i>Anax</i> sp., dragonfly                                                      | <i>Rana pipiens</i> , leopard frog                   | Growth                      |
| Relyea & Yurewicz 2002 <i>Oecologia</i> 131:569-579.           | Aquatic     | <i>Ambystoma tigrinum</i> , tiger salamander                                    | <i>Rana clamitans</i> , green frog                   | Growth, Survival            |
| Relyea & Yurewicz 2002 <i>Oecologia</i> 131:569-579.           | Aquatic     | <i>Anax</i> sp., dragonfly                                                      | <i>Rana clamitans</i> , green frog                   | Growth, Survival            |
| Relyea & Yurewicz 2002 <i>Oecologia</i> 131:569-579.           | Aquatic     | <i>Anax</i> sp., dragonfly, and <i>Ambystoma tigrinum</i>                       | <i>Rana clamitans</i> , green frog                   | Growth, Survival            |
| Relyea 2000 <i>Ecology</i> 81(8): 2278-2289                    | Aquatic     | <i>Anax</i> sp., dragonfly                                                      | <i>Rana pipiens</i> , leopard frog                   | Activity, Growth            |
| Relyea 2000 <i>Ecology</i> 81(8): 2278-2289                    | Aquatic     | <i>Anax</i> sp., dragonfly                                                      | <i>Rana sylvatica</i> , wood frog                    | Activity, Growth            |
| Relyea 2000 <i>Ecology</i> 81(8): 2278-2289                    | Aquatic     | <i>Umbra limi</i> , mudminnow                                                   | <i>Rana pipiens</i> , leopard frog                   | Activity, Growth            |
| Relyea 2000 <i>Ecology</i> 81(8): 2278-2289                    | Aquatic     | <i>Umbra limi</i> , mudminnow                                                   | <i>Rana sylvatica</i> , wood frog                    | Activity, Growth            |
| Relyea 2002 <i>Am Nat</i> 159(3): 272-282                      | Aquatic     | <i>Anax longipes</i> , comet darter                                             | <i>Rana sylvatica</i> , wood frog                    | Activity, Growth            |
| Relyea 2002 <i>Ecol Mon</i> 72(1): 77-93                       | Aquatic     | <i>Anax</i> sp., dragonfly                                                      | <i>Rana sylvatica</i> , wood frog                    | Activity, Growth            |
| Relyea 2002 <i>Ecol Mon</i> 72(4): 523-540                     | Aquatic     | <i>Anax longipes</i> , comet darter                                             | <i>Rana sylvatica</i> , wood frog                    | Activity, Growth            |
| Relyea 2002 <i>Ecology</i> 83(7): 1953-1964                    | Aquatic     | <i>Anax longipes</i> , comet darter                                             | <i>Hyla versicolor</i> , gray treefrog               | Activity, Growth, Survival  |
| Relyea 2003 <i>Ecology</i> 84(7): 1827-1839                    | Aquatic     | <i>Anax</i> sp., dragonfly                                                      | <i>Rana sylvatica</i> , wood frog                    | Activity, Growth            |
| Relyea 2003 <i>Ecology</i> 84(7): 1827-1839                    | Aquatic     | <i>Belostoma</i> sp., waterbug                                                  | <i>Rana sylvatica</i> , wood frog                    | Activity, Growth            |
| Relyea 2003 <i>Ecology</i> 84(7): 1827-1839                    | Aquatic     | <i>Dytiscus</i> sp., diving beetle                                              | <i>Rana sylvatica</i> , wood frog                    | Activity, Growth            |
| Relyea 2003 <i>Ecology</i> 84(7): 1827-1839                    | Aquatic     | <i>Erythemis</i> sp., dragonfly                                                 | <i>Rana sylvatica</i> , wood frog                    | Activity, Growth            |
| Relyea 2004 <i>Ecology</i> 85(1): 172-179                      | Aquatic     | <i>Anax junius</i> , dragonfly                                                  | <i>Rana sylvatica</i> , wood frog                    | Growth                      |
| Repka & Pihlajamaa 1996 <i>Hydrobiologia</i> 339: 67-71        | Aquatic     | <i>Chaoborus obscuripes</i> , midge                                             | <i>Daphnia pulex</i>                                 | Fecundity, Growth           |
| Repka et al 1994 <i>Hydrobiologia</i> 294: 129-140             | Aquatic     | <i>Chaoborus obscuripes</i> , midge                                             | <i>Daphnia pulex</i>                                 | Fecundity, Growth           |
| Repka et al 1994 <i>Hydrobiologia</i> 294: 129-140             | Aquatic     | <i>Dytiscus</i> sp., diving beetle                                              | <i>Daphnia pulex</i>                                 | Fecundity, Growth           |
| Repka et al 1994 <i>Hydrobiologia</i> 294: 129-140             | Aquatic     | <i>Mochlonyx</i> sp., midge                                                     | <i>Daphnia pulex</i>                                 | Fecundity, Growth           |
| Repka et al 1994 <i>Hydrobiologia</i> 294: 129-140             | Aquatic     | <i>Notonecta</i> sp., backswimmer                                               | <i>Daphnia pulex</i>                                 | Fecundity, Growth           |
| Resetarits 2001 <i>Oecologia</i> 129:155-160                   | Aquatic     | <i>Lepomis gibbosus</i> , pumpkinseed sunfish                                   | <i>Tropisternus lateralis</i> , hydrophilid beetle   | Fecundity                   |
| Resetarits 2005 <i>Ecology Letters</i> 8: 480-486              | Aquatic     | <i>Enneacanthus obesus</i> , banded sunfish                                     | <i>Hyla chrysoscelis</i> , Copes gray treefrog       | Fecundity                   |
| Resetarits et al 2004 <i>Oecologia</i> 138:532-538             | Aquatic     | <i>Enneacanthus obesus</i> , banded sunfish                                     | <i>Hyla chrysoscelis</i> , Copes gray treefrog       | Growth, Survival            |

| Reference                                             | System      | Predator species (or closest approximation)       | Prey species (or closest approximation)        | Response variables measured   |
|-------------------------------------------------------|-------------|---------------------------------------------------|------------------------------------------------|-------------------------------|
| Richardson & Brown 1992 JEMBE 163: 169-182            | Aquatic     | Menippe adina, stone crab                         | Thais haemastoma, rock snail                   | Survival                      |
| Rieger et al 2004 Ecology 85(8): 2094-2099            | Aquatic     | Umbra pygmaea, Eastern mudminnow                  | Hyla femoralis, pinewoods treefrog             | Fecundity                     |
| Roitberg et al 1979 J Animal Ecol 48:111-122          | Terrestrial | Coccinella californica, ladybird beetle           | Acyrtosiphon pisum, pea aphid                  | Survival                      |
| Ronkainen & Ylonen 1994 Oecologia 97: 377-381         | Terrestrial | Mustela erminea, stoat                            | Clethrionomys glareolus, bank vole             | Activity                      |
| Saenz et al 2003 Copeia 3: 646-649                    | Aquatic     | Procambarus nigrocinctus, crayfish                | Rana spenocephala, Southern leopard frog       | Survival                      |
| Schaffner & Anholt 1998 J Insect Behav 11(6): 793-809 | Aquatic     | Anax imperator, dragonfly                         | Ischnura elegans, damselfly                    | Activity, Growth              |
| Schalk et al 2002 Copeia 2002(2): 445-449             | Aquatic     | Macrobdella decora, leech                         | Rana clamitans, green frog                     | Growth                        |
| Scheiner & Berrigan 1998 Evolution 52(2): 368-378     | Aquatic     | Chaoborus americanus, phantom midge               | Daphnia pulex                                  | Fecundity, Growth             |
| Scheuerlein et al 2001 Proc Roy Soc B 268: 1575-1582  | Terrestrial | Lanius collaris, fiscal shrike                    | Saxicola toquata axillaris, Stonechat          | Growth                        |
| Schmidt & Van Buskirk 2005 J Evol Biol 18: 415-425    | Aquatic     | Aeshna cyanea, dragonfly                          | Triturus carnifex, newt                        | Activity, Growth              |
| Schmidt & Van Buskirk 2005 J Evol Biol 18: 415-425    | Aquatic     | Aeshna cyanea, dragonfly                          | Triturus cristatus, newt                       | Activity, Growth              |
| Schmidt & Van Buskirk 2005 J Evol Biol 18: 415-425    | Aquatic     | Aeshna cyanea, dragonfly                          | Triturus marmoratus, newt                      | Activity, Growth              |
| Schmidt & Van Buskirk 2005 J Evol Biol 18: 415-425    | Aquatic     | Aeshna cyanea, dragonfly                          | Triturus vulgaris, smooth newt                 | Activity, Growth              |
| Schmitz Am Nat 1998 151(4): 327-342                   | Terrestrial | Pisurina mira, nursery-web hunting spider         | Chorthippus curtipennis, grasshopper           | Survival                      |
| Schmitz Am Nat 1998 151(4): 327-342                   | Terrestrial | Pisurina mira, nursery-web hunting spider         | Melanoplus femurrubrum, red-legged grasshopper | Survival                      |
| Schmitz et al. Ecology 1997 78(5): 1388-1399          | Terrestrial | Pisurina mira, nursery-web hunting spider         | Melanoplus femurrubrum, red-legged grasshopper | Activity, Survival            |
| Schoepfner & Relyea 2005 Ecology Letters 8: 505-512   | Aquatic     | Anax junius, dragonfly                            | Hyla versicolor, gray treefrog                 | Activity, Growth              |
| Scrimgeour & Culp 1994 Oecologia 100:128-134          | Aquatic     | Rhinichthys cataractae, longnose dace             | Baetis tricaudatus, mayfly                     | Fecundity, Growth             |
| Sih & Krupa 1996 Oecologia 105:179-188                | Aquatic     | Lepomis cyanellus, green sunfish                  | Aquarius remigis, stream waterstrider          | Fecundity                     |
| Sih et al 1990 Am. Nat. 135:284-290                   | Aquatic     | Lepomis cyanellus, green sunfish                  | Gerris remigis, water strider                  | Activity, Fecundity           |
| Skelly 1992 Ecology 73(2): 704-708                    | Aquatic     | Ambystoma tigrinum tigrinum, tiger salamander     | Hyla versicolor, gray treefrog                 | Activity, Growth              |
| Skelly 1995 Ecology 76(1):150-164                     | Aquatic     | Anax junius, dragonfly                            | Pseudacris crucifer, spring peeper             | Activity, Growth              |
| Skelly 1995 Ecology 76(1):150-164                     | Aquatic     | Anax junius, dragonfly                            | Pseudacris triseriata, chorus frog             | Activity, Growth              |
| Skelly and Werner 1990 Ecology 71(6): 2313-2322       | Aquatic     | Anax junius, dragonfly                            | Bufo americanus, american toad                 | Activity, Growth              |
| Smith & Jennings 2000 Mar Biol 136: 461-469           | Aquatic     | Carcinus maenas, green crab                       | Mytilus edulis, blue mussel                    | Growth                        |
| Smith & Jennings 2000 Mar Biol 136: 461-469           | Aquatic     | Nucella lapillus, Atlantic dogwhelk               | Mytilus edulis, blue mussel                    | Growth                        |
| Soluk & Collins 1988 Oikos 52:94-100                  | Aquatic     | Cottus bairdi, mottled sculpin                    | Agnetina capitata, stonefly                    | Survival                      |
| Sparrevik and Leonardsson 1999 Oecologia 120: 77-86   | Aquatic     | Saduria entomon, isopod                           | Monoporeia affinis, amphipod                   | Activity, Fecundity, Growth   |
| Stachowicz & Hay 1999 Ecology 80(2): 495-509          | Aquatic     | Lagodon rhomboides, pinfish                       | Libinia dubia, decorator crab                  | Feeding rate                  |
| Stamp & Bowers 1991 Oecologia 88: 325-330             | Terrestrial | Podisus maculiventris, stinkbug                   | Junonia coenia, common buckeye butterfly       | Survival                      |
| Stamp & Bowers 1991 Oecologia 88: 325-330             | Terrestrial | Polistes dominulus and P. fuscatus, vespids wasps | Hemileuca lucina, New England buckmoth         | Survival                      |
| Stamp & Bowers 1993 Oecologia 95: 376-384             | Terrestrial | Podisus maculiventris, stinkbug                   | Junonia coenia, common buckeye butterfly       | Survival                      |
| Stamp & Bowers 1993 Oecologia 95: 376-384             | Terrestrial | Polistes fuscatus, wasp                           | Junonia coenia, common buckeye butterfly       | Survival                      |
| Stamp 1997 Oikos 79:147-154                           | Terrestrial | Polistes fuscatus, wasp (simulated)               | Junonia coenia, common buckeye butterfly       | Growth                        |
| Stamp 1997 Oikos 79:147-154                           | Terrestrial | Polistes fuscatus, wasp (simulated)               | Pyrrharctia isabella, Isabella tiger moth      | Growth                        |
| Stemberger 1988 Limnol Ocean 33(4, part 1): 593-606   | Aquatic     | Asplanchna brightwelli, rotifer                   | Keratella testudo, rotifer                     | Growth                        |
| Stibor & Luning 1994 Functional Ecology 8: 97-101     | Aquatic     | Chaoborus flavicans, phantom midge                | Daphnia hyalina                                | Growth                        |
| Stibor & Luning 1994 Functional Ecology 8: 97-101     | Aquatic     | Leuciscus idus, golden orfe                       | Daphnia hyalina                                | Growth                        |
| Stibor & Luning 1994 Functional Ecology 8: 97-101     | Aquatic     | Notonecta glauca, backswimmer                     | Daphnia hyalina                                | Growth                        |
| Stibor 1992 Oecologia 92: 162-165                     | Aquatic     | Leuciscus idus, golden orfe                       | Daphnia hyalina                                | Fecundity                     |
| Stoks & McPeck 2003 Ecology 84(12): 3327-3338         | Aquatic     | Anax junius, dragonfly                            | Lestes congener, damselfly                     | Activity, Habitat use         |
| Stoks & McPeck 2003 Ecology 84(12): 3327-3338         | Aquatic     | Anax junius, dragonfly                            | Lestes disjunctus, damselfly                   | Activity, Habitat use         |
| Stoks & McPeck 2003 Ecology 84(12): 3327-3338         | Aquatic     | Anax junius, dragonfly                            | Lestes dryas, damselfly                        | Activity, Growth, Habitat use |
| Stoks & McPeck 2003 Ecology 84(12): 3327-3338         | Aquatic     | Anax junius, dragonfly                            | Lestes eurinus, damselfly                      | Activity, Growth, Habitat use |
| Stoks & McPeck 2003 Ecology 84(12): 3327-3338         | Aquatic     | Anax junius, dragonfly                            | Lestes forcipatus, damselfly                   | Activity, Habitat use         |
| Stoks & McPeck 2003 Ecology 84(12): 3327-3338         | Aquatic     | Anax junius, dragonfly                            | Lestes rectangularis, damselfly                | Activity, Growth, Habitat use |
| Stoks & McPeck 2003 Ecology 84(12): 3327-3338         | Aquatic     | Anax junius, dragonfly                            | Lestes vigilax, damselfly                      | Activity, Growth, Habitat use |
| Stoks & McPeck 2003 Ecology 84(12): 3327-3338         | Aquatic     | Lepomis gibbosus, pumpkinseed sunfish             | Lestes congener, damselfly                     | Activity, Habitat use         |
| Stoks & McPeck 2003 Ecology 84(12): 3327-3338         | Aquatic     | Lepomis gibbosus, pumpkinseed sunfish             | Lestes disjunctus, damselfly                   | Activity, Habitat use         |
| Stoks & McPeck 2003 Ecology 84(12): 3327-3338         | Aquatic     | Lepomis gibbosus, pumpkinseed sunfish             | Lestes dryas, damselfly                        | Activity, Growth, Habitat use |
| Stoks & McPeck 2003 Ecology 84(12): 3327-3338         | Aquatic     | Lepomis gibbosus, pumpkinseed sunfish             | Lestes eurinus, damselfly                      | Activity, Growth, Habitat use |

| Reference                                             | System      | Predator species (or closest approximation)                  | Prey species (or closest approximation)                | Response variables measured   |
|-------------------------------------------------------|-------------|--------------------------------------------------------------|--------------------------------------------------------|-------------------------------|
| Stoks & McPeck 2003 Ecology 84(12): 3327-3338         | Aquatic     | <i>Lepomis gibbosus</i> , pumpkinseed sunfish                | <i>Lestes forcipatus</i> , damselfly                   | Activity, Habitat use         |
| Stoks & McPeck 2003 Ecology 84(12): 3327-3338         | Aquatic     | <i>Lepomis gibbosus</i> , pumpkinseed sunfish                | <i>Lestes rectangularis</i> , damselfly                | Activity, Growth, Habitat use |
| Stoks & McPeck 2003 Ecology 84(12): 3327-3338         | Aquatic     | <i>Lepomis gibbosus</i> , pumpkinseed sunfish                | <i>Lestes vigilax</i> , damselfly                      | Activity, Growth, Habitat use |
| Stoks 1998 Oecologia 117:443-448                      | Aquatic     | <i>Notonecta glauca</i> , backswimmer                        | <i>Lestes sponsa</i> , damselfly                       | Activity, Feeding rate        |
| Stoks 2001 Oecologia 127:222-229                      | Aquatic     | <i>Aeshna cyanea</i> , dragonfly                             | <i>Lestes sponsa</i> , damselfly                       | Growth                        |
| Stoks et al 1999 Evol Ecol 13: 115-129                | Aquatic     | <i>Aeshna cyanea</i> , dragonfly                             | <i>Lestes sponsa</i> , damselfly                       | Growth, Survival              |
| Stoks et al 1999 Oecologia 120:87-91                  | Aquatic     | <i>Aeshna cyanea</i> , dragonfly                             | <i>Lestes sponsa</i> , damselfly                       | Growth, Survival              |
| Stoks et al 2005 J Animal Ecol 74: 708-715            | Aquatic     | <i>Perca fluviatilis</i> , Eurasian perch                    | <i>Lestes sponsa</i> , damselfly                       | Growth                        |
| Storfer & Sih 1998 Evolution 52(2): 558-565           | Aquatic     | <i>Lepomis cyanellus</i> , green sunfish                     | <i>Ambystoma barbouri</i> , streamside salamander      | Feeding rate                  |
| Storfer & White 2005 J Herp 38(4): 612-615            | Aquatic     | <i>Anax junius</i> , dragonfly                               | <i>Ambystoma tigrinum nebulosum</i>                    | Growth                        |
| Storfer & White 2005 J Herp 38(4): 612-615            | Aquatic     | <i>Dytiscus</i> sp., diving beetle                           | <i>Ambystoma tigrinum nebulosum</i>                    | Growth                        |
| Takahara et al 2003 Ecological Res 18: 793-806        | Aquatic     | <i>Carassius auratus</i> , goldfish                          | <i>Hyla japonica</i> , treefrog                        | Survival                      |
| Teplitsky et al 2004 Ecology 85(10):2888-2894         | Aquatic     | <i>Aeshna cyanea</i> , dragonfly                             | <i>Rana dalmatina</i> , agile frog                     | Growth                        |
| Teplitsky et al 2004 Ecology 85(10):2888-2894         | Aquatic     | <i>Aeshna cyanea</i> , dragonfly                             | <i>Rana ridibunda</i>                                  | Growth                        |
| Teplitsky et al 2004 Ecology 85(10):2888-2894         | Aquatic     | <i>Gasterosteus aculeatus</i> , three-spined stickleback     | <i>Rana dalmatina</i> , agile frog                     | Growth                        |
| Teplitsky et al 2004 Ecology 85(10):2888-2894         | Aquatic     | <i>Gasterosteus aculeatus</i> , three-spined stickleback     | <i>Rana ridibunda</i>                                  | Growth                        |
| Teplitsky et al 2005 Oecologia 145: 364-370           | Aquatic     | <i>Gasterosteus aculeatus</i> , three-spined stickleback     | <i>Rana dalmatina</i> , agile frog                     | Growth                        |
| Thiemann & Wassersug 2000 Biol J Linn Soc 71: 513-528 | Aquatic     | <i>Fundulus diaphanus</i> , banded killifish                 | <i>Rana clamitans</i> , green frog                     | Activity, Growth              |
| Tollrian 1995 Ecology 76(6): 1691-1705                | Aquatic     | <i>Chaoborus flavicans</i> , phantom midge                   | <i>Daphnia pulex</i>                                   | Fecundity, Growth             |
| Trussell & Nicklin 2002 Ecology 83(6): 1635-1647      | Aquatic     | <i>Carcinus maenas</i> , green crab                          | <i>Littorina obtusata</i> , snail                      | Growth                        |
| Trussell & Smith 2000 PNAS 97(5): 2123-2127           | Aquatic     | <i>Carcinus maenas</i> , green crab                          | <i>Littorina obtusata</i> , snail                      | Growth                        |
| Trussell et al 2003 Ecology 84(3): 629-640            | Aquatic     | <i>Carcinus maenas</i> , green crab                          | <i>Littorina littorea</i> , snail                      | Growth                        |
| Trussell et al 2003 Ecology 84(3): 629-640            | Aquatic     | <i>Carcinus maenas</i> , green crab                          | <i>Nucella lapillus</i> , Atlantic dogwhelk            | Growth                        |
| Turner & Montgomery 2003 Ecology 84(3): 616-622       | Aquatic     | <i>Lepomis gibbosus</i> , pumpkinseed sunfish                | <i>Physa acuta</i> , snail                             | Growth, Habitat use           |
| Turner 2004 Oikos 104(3): 561-569                     | Aquatic     | <i>Cambarus bartonii</i> , crayfish                          | <i>Helisoma trivolvis</i> , pulmonate snail            | Growth, Habitat use           |
| Turner et al 2000 Oikos 88:148-158                    | Aquatic     | <i>Lepomis gibbosus</i> , pumpkinseed sunfish                | <i>Physella gyrina</i> , freshwater snail              | Habitat use                   |
| Van Buskirk & Schmidt 2000 Ecology 81(11): 3009-3028  | Aquatic     | <i>Aeshna cyanea</i> , dragonfly                             | <i>Triturus alpestris</i> , alpine newt                | Habitat use, Survival         |
| Van Buskirk & Schmidt 2000 Ecology 81(11): 3009-3028  | Aquatic     | <i>Aeshna cyanea</i> , dragonfly                             | <i>Triturus helveticus</i> , palmate newt              | Growth, Habitat use, Survival |
| Van Buskirk and Yurewicz 1998 Oikos 82: 20-28         | Aquatic     | <i>Anax junius</i> , dragonfly                               | <i>Rana sylvatica</i> , wood frog                      | Activity, Growth              |
| Vorndran et al 2002 Ecology 83(6): 1648-1659          | Aquatic     | <i>Aeshna cyanea</i> , dragonfly                             | <i>Bombina bombina</i> , fire-bellied toad             | Growth                        |
| Vorndran et al 2002 Ecology 83(6): 1648-1659          | Aquatic     | <i>Aeshna cyanea</i> , dragonfly                             | <i>Bombina variegata</i> , fire-bellied toad           | Growth                        |
| Walker & Rypstra 2003 J Arachnology 31: 425-427       | Terrestrial | <i>Hogna helluo</i> , wolf spider                            | <i>Pardosa milvina</i> , wolf spider                   | Survival                      |
| Walls et al 1991 Oecologia 87:43-50                   | Aquatic     | <i>Chaoborus crystallinus</i> , midge                        | <i>Daphnia pulex</i>                                   | Fecundity, Survival           |
| Walls et al 1997 Freshwater Biology 38:353-364        | Aquatic     | <i>Chaoborus</i> sp., midge                                  | <i>Daphnia pulex</i>                                   | Growth                        |
| Walls et al 2002 Herpetologica 58(1):104-118          | Aquatic     | <i>Gambusia affinis</i> , western mosquitofish               | <i>Gastrophryne carolinensis</i> , narrow-mouthed toad | Growth, Habitat use, Survival |
| Walls et al 2002 Herpetologica 58(1):104-118          | Aquatic     | <i>Gambusia affinis</i> , western mosquitofish               | <i>Hyla squirella</i> , squirrel treefrog              | Growth, Habitat use, Survival |
| Walls et al 2002 Herpetologica 58(1):104-118          | Aquatic     | <i>Procamburus</i> sp., crayfish                             | <i>Gastrophryne carolinensis</i> , narrow-mouthed toad | Growth, Survival              |
| Weber & Declerk 1997 Hydrobiologia 360: 89-99         | Aquatic     | <i>Chaoborus americanus</i> , phantom midge                  | <i>Daphnia galeata</i>                                 | Fecundity, Growth, Survival   |
| Weber & Declerk 1997 Hydrobiologia 360: 89-99         | Aquatic     | <i>Perca fluviatilis</i> , Eurasian perch                    | <i>Daphnia galeata</i>                                 | Fecundity, Growth, Survival   |
| Weber 2001 J Plankton Research 23(1):41-46            | Aquatic     | <i>Chaoborus</i> sp., midge                                  | <i>Daphnia galeata</i>                                 | Growth                        |
| Weber 2001 J Plankton Research 23(1):41-46            | Aquatic     | <i>Perca fluviatilis</i> , Eurasian perch                    | <i>Daphnia galeata</i>                                 | Growth                        |
| Weber et al 2003 Hydrobiologia 491: 273-287           | Aquatic     | <i>Chaoborus americanus</i> , phantom midge                  | <i>Daphnia galeata</i>                                 | Growth                        |
| Weetman & Atkinson 2002 Oikos 98: 299-307             | Aquatic     | <i>Gasterosteus aculeatus</i> , three-spined stickleback     | <i>Daphnia pulex</i>                                   | Fecundity                     |
| Werner & Anholt 1996 Ecology 77:157-169               | Aquatic     | <i>Anax junius</i> , dragonfly                               | <i>Rana catesbeiana</i> , bullfrog                     | Growth, Survival              |
| Werner & Anholt 1996 Ecology 77:157-169               | Aquatic     | <i>Anax junius</i> , dragonfly                               | <i>Rana clamitans</i> , green frog                     | Growth, Survival              |
| Werner & Peacor 2006 Ecology 87(2): 347-361           | Aquatic     | <i>Anax junius</i> , dragonfly                               | <i>Rana clamitans</i> , green frog                     | Activity, Growth              |
| Werner 1991 Ecology 72(5): 1709-1720                  | Aquatic     | <i>Anax junius</i> , dragonfly                               | <i>Rana catesbeiana</i> , bullfrog                     | Activity, Growth              |
| Werner 1991 Ecology 72(5): 1709-1720                  | Aquatic     | <i>Anax junius</i> , dragonfly                               | <i>Rana clamitans</i> , green frog                     | Activity, Growth              |
| Wilder & Rypstra 2004 Env Ent 33(4): 1032-1036        | Terrestrial | <i>Tenodera aridifolia sinensis</i> , Chinese praying mantis | <i>Pardosa milvina</i> , wolf spider                   | Activity, Growth, Survival    |
| Wolff & Davis-Born 1997 Oikos 79: 543-548             | Terrestrial | <i>Mustela vison</i> , mink                                  | <i>Microtus canicaudus</i> , grey-tailed vole          | Activity, Fecundity           |
| Yamada et al 1998 JEMBE 220: 213-226                  | Aquatic     | <i>Cancer productus</i> , red rock crab                      | <i>Littorina sitkana</i> , snail                       | Growth                        |

| <b>Reference</b>                                    | <b>System</b> | <b>Predator species (or closest approximation)</b> | <b>Prey species (or closest approximation)</b> | <b>Response variables measured</b> |
|-----------------------------------------------------|---------------|----------------------------------------------------|------------------------------------------------|------------------------------------|
| Ylonen & Ronkainen 1994 <i>Evol Ecol</i> 8: 658-666 | Terrestrial   | <i>Mustela erminea</i> , stoat                     | <i>Clethrionomys glareolus</i> , bank vole     | Fecundity, Growth                  |
| Ylonen 1989 <i>Oikos</i> 55(1): 138-140             | Terrestrial   | <i>Mustela nivalis nivalis</i> , least weasel      | <i>Clethrionomys glareolus</i> , bank vole     | Fecundity                          |
